# Supplementary material for: Cancer Cachexia among Patients with Advanced Non-Small-Cell Lung Cancer on Immunotherapy: An Observational Study with Exploratory Gut Microbiota Analysis
Source: MDPI journal article supplement (doi:10.3390/cancers14215405), 2022-11-02
Supplement: s1 [file s1]

# Supplementary Materials: Cancer Cachexia among Patients with Advanced Non-Small-Cell Lung Cancer on Immunotherapy: An Observational Study with Exploratory Gut Microbiota Analysis

Taiki Hakozaiki, Alexis Nolin-Lapalme, Masato Kogawa, Yusuke Okuma, Shohei Nakamura, Danielle Moreau-Amaru, Taichi Tamura, Yukio Hosomi, Haruko Takeyama, Corentin Richard, Masahito Hosokawa and Bertrand Routy

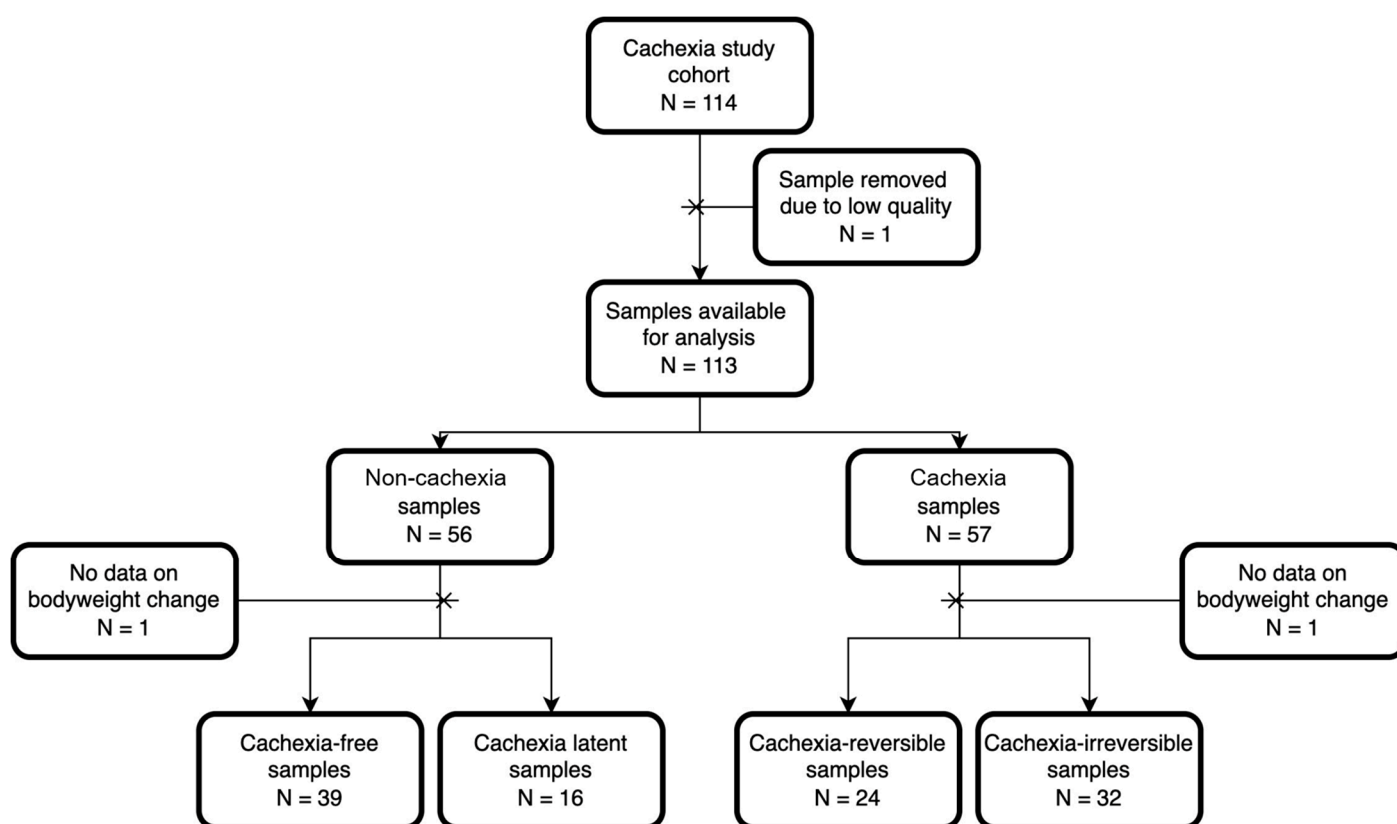

Figure S1. Study flow.

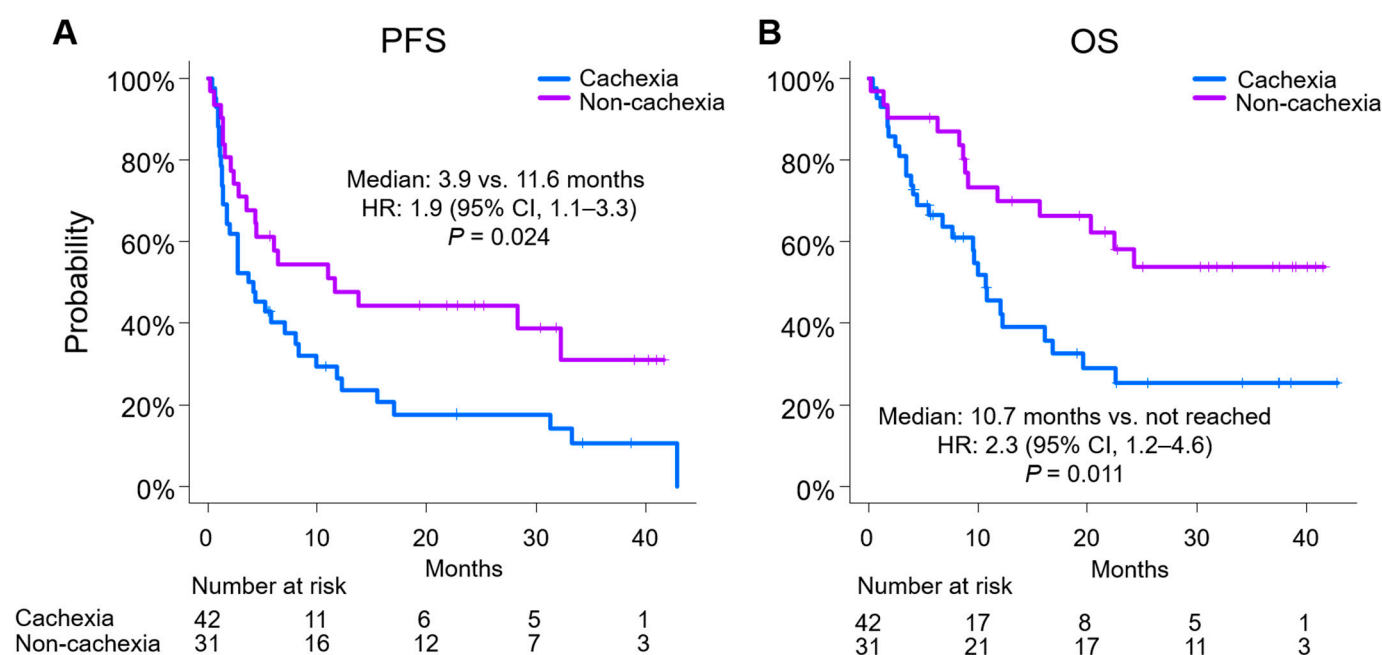

**Figure S2.** Estimated Kaplan–Meier curves for (A) PFS and (B) OS comparing patients with cancer cachexia against those without cachexia (non-cachexia) among those treated with ICI monotherapy.

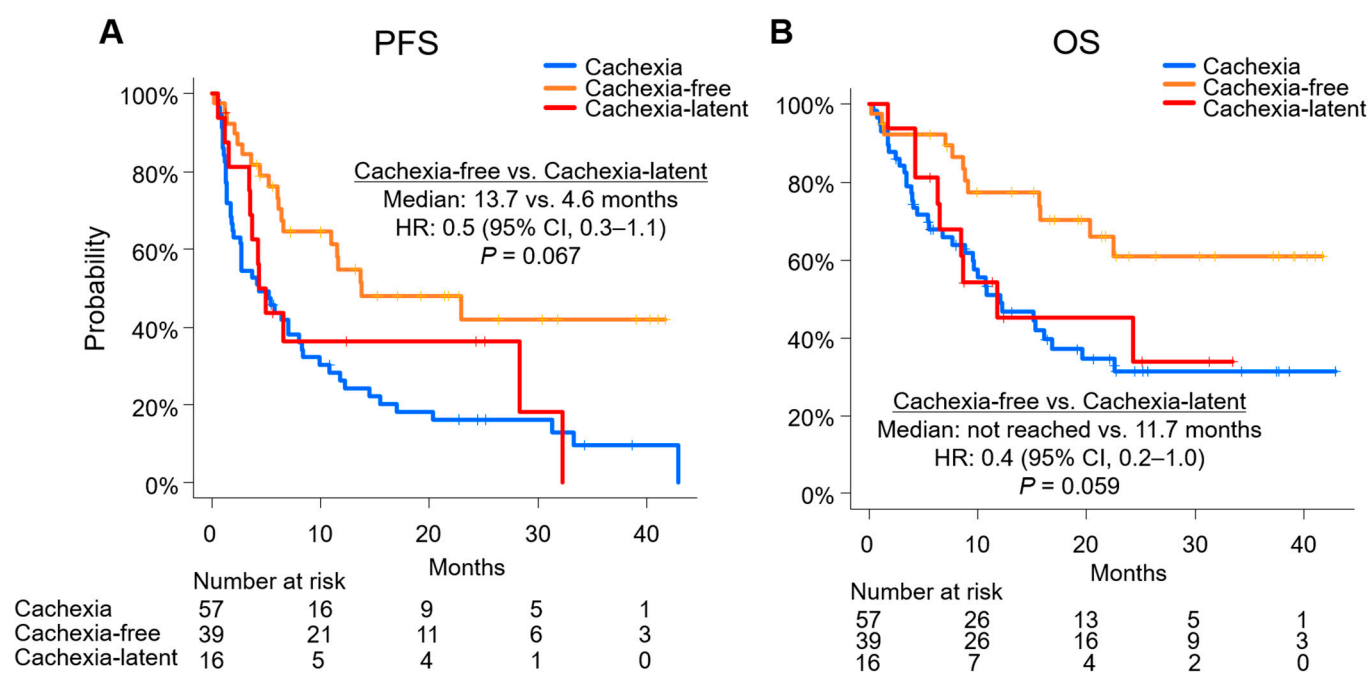

**Figure S3.** Estimated Kaplan–Meier curves for PFS and OS considering changes in the patients' longitudinal body weight during ICI therapy; (A) PFS and (B) OS comparing the "cachexia-free" and "cachexia-latent" groups against those with cachexia at baseline.

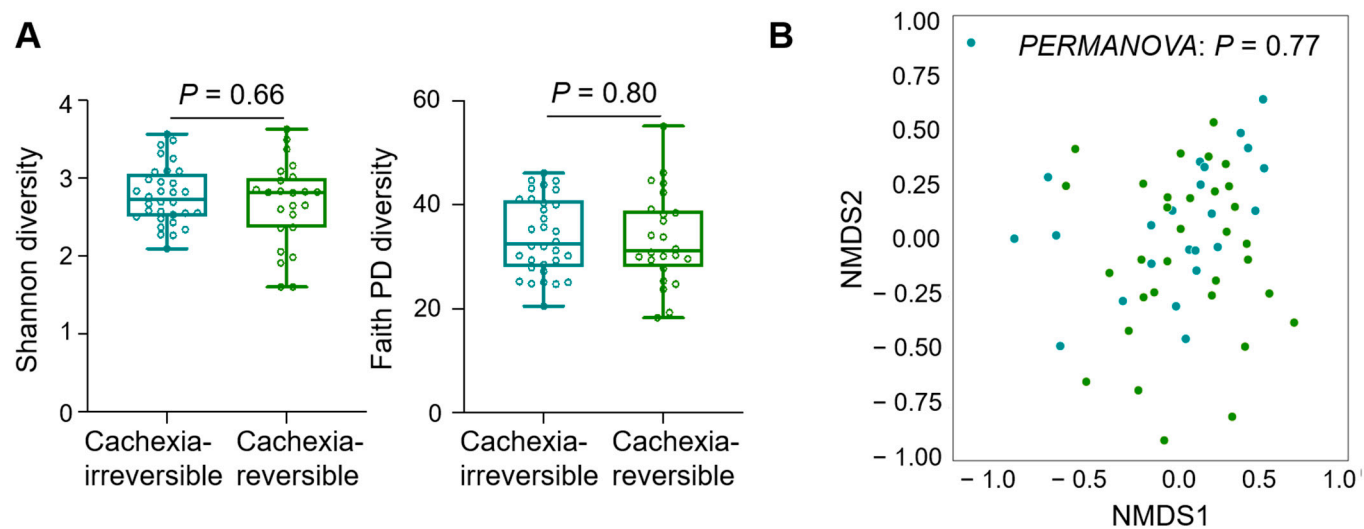

**Figure S4.** Differential analysis of GM stratified according to changes in the patients' longitudinal body weight during ICI therapy: (A) alpha diversity analysis with the Shannon and FaithPD indices, (B) ordination method-based nonmetric multidimensional scaling plots with Bray–Curtis distance.
